# Supplementary material for: Assessment of sedentary behaviors and transport-related activities by questionnaire: a validation study
Source: PubMed Central journal article supplement (PMC4977835; doi:10.1186/s12889-016-3412-3), 2016-08-09
Supplement: 12889_2016_3412_MOESM1_ESM.pdf [file 12889_2016_3412_MOESM1_ESM.pdf]

# STAQ

## The SEDENTARY, TRANSPORTATION AND ACTIVITY QUESTIONNAIRE

This questionnaire is designed to find out about your sedentary, transportation and physical activities in your everyday life in **the last 4 weeks**.

**This questionnaire is divided into 5 sections:**

- **Section A** is about your physical activity patterns in the house
- **Section B** is about your activity at work
- **Section C** is about your transportation activities
- **Section D** is about your leisure activities
- **Section E** is about your physical activities in general

Your answers will be treated as strictly confidential and will be used only for medical research.

Please answer every question, except when you are explicitly asked to ignore some of the questions.

**What is your employment status?**

- Full-time
- Part-time
- Student, training
- Retired or early retirement
- Disability
- Unemployment, income support,...
- Without employment (has never worked or has stopped working but does not correspond to one of the previous conditions)

What is your main activity ? \_\_\_\_\_

If you have a second regular activity, please precise: \_\_\_\_\_

## **Section A : Home activities**

**In the last 4 weeks**, how much time did you spend on average doing household activities from moderate to high intensity (such as vacuuming, wiping the floor or any comparable activities): |\_\_|\_\_| **hours** |\_\_|\_\_| **minutes per week**

**Address of your principal residence/home:**

Street : \_\_\_\_\_

Postcode : \_\_\_\_\_

City : \_\_\_\_\_

State/Region: \_\_\_\_\_

Country : \_\_\_\_\_

## **Section B : Activity at work / studying**

**Have you been in paid employment OR have you done regular voluntary work OR have you been studying/training at any time during the last 4 weeks?**

YES

NO

**If you have not been working (*paid employment, voluntary work, studying, training*) during the last 4 weeks, please proceed to “Section C: Transportation”**

**During 4 weeks**, how many hours work did you do per week in total (*paid employment, voluntary work, studying, training*)?

Please indicate the number of hours per week without considering commuting time between residence and workplace.

4 weeks ago |\_\_|\_\_| H

3 weeks ago |\_\_|\_\_| H

2 weeks ago |\_\_|\_\_| H

1 week ago |\_\_|\_\_| H

### **Type of work**

We would like to know **the type and amount of physical activity involved in your work**. Please tick (✓) the option that best corresponds with your occupation(s) (*paid employment, voluntary work, studying, training*) **in the last 4 weeks** from the following four possibilities:

**Please tick only one of the following**

**Sedentary occupation** You spend most of your time sitting

**Standing occupation** You spend most of your time standing or walking. However, your work does not require intense physical effort (*e.g. shop assistant, hairdresser, guard*)

**Manual work** This involves some physical effort including handling of heavy objects and use of tools. (*e.g. plumber, electrician, carpenter*)

**Heavy manual work** This implies very vigorous physical activity including handling of very heavy objects (*e.g. dock worker, miner, bricklayer, construction worker*)

Please choose from 1 (*very sedentary work*) to 5 (*intense activity*) what best corresponds with the **intensity of physical activity demanded by your occupation** in the past 4 weeks. Please tick (✓) one of the following options only:

- 1. Mainly sitting
- 2. Combination of sitting/standing
- 3. Mainly standing
- 4. Some physical effort
- 5. Heavy manual work

### **Section C: Transportation**

**In the last 4 weeks**, which mode of transport have you used **most often**, apart from transportation for recreation or leisure time?

Please tick (✓) one box only.

- Car/Motor vehicle
- Public transport
- Walk
- Cycle
- Other active transport (skate, rollers,...)

**If you have not been working (*paid employment, voluntary work, studying, training*) during the last 4 weeks, please proceed to “Section C.3: Utilitarian travels, out of work-related travels or travels for recreations and leisure”**

#### **Section C.1: Travel to and from work in the last 4 weeks**

In order to evaluate your travels to and from your place of work, please indicate the address of your main place of work:

**Address of your main place of work during the last 4 weeks:**

Street : \_\_\_\_\_  
 Postcode : \_\_\_\_\_  
 City : \_\_\_\_\_  
 State/Region: \_\_\_\_\_  
 Country : \_\_\_\_\_

**In the last 4 weeks**, how many times a week did you travel from home to your main work? (*Count the outward journeys only*) |\_|\_|\_|

We will now ask you to detail how many times and for how long you have used each form of transport in different conditions.

Please indicate in the following table **how many days per week, during the last 4 weeks**, you have used each form of transport to go (and/or come back) from your work.

|                                             | Number of days per week |
|---------------------------------------------|-------------------------|
| Car/Motor vehicle                           | _                       |
| Public transport                            | _                       |
| Walk                                        | _                       |
| Cycle                                       | _                       |
| Other active transport (skate, rollers,...) | _                       |

STAQ – English translation 2016

Please indicate in the following table **the average length of time per day, during the last 4 weeks**, you have spent using each form of transport to go (and/or come back) from your work.

|                                                | average time per day |
|------------------------------------------------|----------------------|
| Car/Motor vehicle                              | _   _  H  _   _  min |
| Public transport                               | _   _  H  _   _  min |
| Walk                                           | _   _  H  _   _  min |
| Cycle                                          | _   _  H  _   _  min |
| Other active transport<br>(skate, rollers,...) | _   _  H  _   _  min |

**Section C.2 Business and work-related travel out of your main work place in the last 4 weeks**

Do you have to travel out of your main work place (i.e. client appointment, site visit,...), with the exception of home/work travels?

YES

NO

If **YES**, please fill in the 2 following tables. **Please indicate in the first one how many days per week during the last 4 weeks**, you have spent using each form of transport for your business travels (i.e. client appointment, site visit,...), with the exception of home/work travels.

|                                                | Number of days per week |
|------------------------------------------------|-------------------------|
| Car/Motor vehicle                              | _                       |
| Public transport                               | _                       |
| Walk                                           | _                       |
| Cycle                                          | _                       |
| Other active transport<br>(skate, rollers,...) | _                       |

Please indicate in the following table **the average length of time per day, during the last 4 weeks**, you have spent using each form of transport for your business travels (i.e. client appointment, site visit,...), with the exception of home/work travels.

|                                                | average time per day |
|------------------------------------------------|----------------------|
| Car/Motor vehicle                              | _   _  H  _   _  min |
| Public transport                               | _   _  H  _   _  min |
| Walk                                           | _   _  H  _   _  min |
| Cycle                                          | _   _  H  _   _  min |
| Other active transport<br>(skate, rollers,...) | _   _  H  _   _  min |

**Section C.3: Utilitarian travels, out of work-related travels or travels for recreations and leisure, in the last 4 weeks**

Please indicate in the following table how many days per week *during the last 4 weeks*, you have spent using each form of transport for your utilitarian travels (i.e. shopping (grocery, post office, library, pharmacy,...), taking children to and from school, visiting relatives, going to the theatre,...), with the exception of work-related travels or travels for recreations and leisure

|                                               | Number of days per week |
|-----------------------------------------------|-------------------------|
| Car/Motor vehicle                             | _                       |
| Public transport                              | _                       |
| Walk                                          | _                       |
| Cycle                                         | _                       |
| Other active transport<br>(skate, rollers,... | _                       |

Please indicate in the following table **the average length of time per day, during the last 4 weeks**, you have spent using each form of transport for your utilitarian travels (i.e. shopping (grocery, post office, library, pharmacy,...), taking children to and from school, visiting relatives, going to the theatre,...), with the exception of work-related travels or travels for recreations and leisure

|                                               | average time per day |
|-----------------------------------------------|----------------------|
| Car/Motor vehicle                             | _ _  H  _ _  min     |
| Public transport                              | _ _  H  _ _  min     |
| Walk                                          | _ _  H  _ _  min     |
| Cycle                                         | _ _  H  _ _  min     |
| Other active transport<br>(skate, rollers,... | _ _  H  _ _  min     |

**Section D : Recreation/Leisure**

The following questions ask about how you spent your leisure time.

**Please indicate in the following table how often you did each activity on average over the last 4 weeks. Please indicate also the average length of time that you spent doing the activity on each occasion.**

|                                                                 | Number of times you did the activity in the last 4 weeks |                          |                                  |             |                     |                     |           | Average time per episode |         |
|-----------------------------------------------------------------|----------------------------------------------------------|--------------------------|----------------------------------|-------------|---------------------|---------------------|-----------|--------------------------|---------|
|                                                                 | None                                                     | Once in the last 4 weeks | 2 to 3 times in the last 4 weeks | Once a week | 2 to 3 times a week | 4 to 5 times a week | Every day | Hours                    | Minutes |
| Walking for pleasure (not as a means of transport)              |                                                          |                          |                                  |             |                     |                     |           |                          |         |
| Cycling for pleasure (not as a means of transport)              |                                                          |                          |                                  |             |                     |                     |           |                          |         |
| Light gardening (watering, mowing the lawn, weeding or pruning) |                                                          |                          |                                  |             |                     |                     |           |                          |         |
| Heavy gardening (Digging, shovelling, chopping wood)            |                                                          |                          |                                  |             |                     |                     |           |                          |         |
| DIY (carpentry, home or car maintenance)                        |                                                          |                          |                                  |             |                     |                     |           |                          |         |
| Backpacking, trekking                                           |                                                          |                          |                                  |             |                     |                     |           |                          |         |
| Climbing                                                        |                                                          |                          |                                  |             |                     |                     |           |                          |         |
| Swimming leisurely                                              |                                                          |                          |                                  |             |                     |                     |           |                          |         |
| Swimming competitive                                            |                                                          |                          |                                  |             |                     |                     |           |                          |         |
| Jogging                                                         |                                                          |                          |                                  |             |                     |                     |           |                          |         |
| Floor exercises (stretching, bending)                           |                                                          |                          |                                  |             |                     |                     |           |                          |         |
| Relaxation exercises (yoga, Qi Qong)                            |                                                          |                          |                                  |             |                     |                     |           |                          |         |
| Conditioning exercises (using a bike or a rowing machine)       |                                                          |                          |                                  |             |                     |                     |           |                          |         |
| Aquagym                                                         |                                                          |                          |                                  |             |                     |                     |           |                          |         |
| High impact aerobics or step aerobics                           |                                                          |                          |                                  |             |                     |                     |           |                          |         |
| Other types of aerobics (zumba...)                              |                                                          |                          |                                  |             |                     |                     |           |                          |         |
| Exercises with weights                                          |                                                          |                          |                                  |             |                     |                     |           |                          |         |
| Racing or rough terrain cycling                                 |                                                          |                          |                                  |             |                     |                     |           |                          |         |

STAQ – English translation 2016

|                                       | Number of times you did the activity in the last 4 weeks |                                 |                                         |                    |                            |                            |                  | Average time per episode |                |
|---------------------------------------|----------------------------------------------------------|---------------------------------|-----------------------------------------|--------------------|----------------------------|----------------------------|------------------|--------------------------|----------------|
|                                       | <i>None</i>                                              | <i>Once in the last 4 weeks</i> | <i>2 to 3 times in the last 4 weeks</i> | <i>Once a week</i> | <i>2 to 3 times a week</i> | <i>4 to 5 times a week</i> | <i>Every day</i> | <i>Hours</i>             | <i>Minutes</i> |
| Competitive running                   |                                                          |                                 |                                         |                    |                            |                            |                  |                          |                |
| Track and field                       |                                                          |                                 |                                         |                    |                            |                            |                  |                          |                |
| Skiing, snowboard                     |                                                          |                                 |                                         |                    |                            |                            |                  |                          |                |
| Tennis or badminton                   |                                                          |                                 |                                         |                    |                            |                            |                  |                          |                |
| Squash                                |                                                          |                                 |                                         |                    |                            |                            |                  |                          |                |
| Table tennis                          |                                                          |                                 |                                         |                    |                            |                            |                  |                          |                |
| Bowling, indoor lawn or 10 pin        |                                                          |                                 |                                         |                    |                            |                            |                  |                          |                |
| Golf                                  |                                                          |                                 |                                         |                    |                            |                            |                  |                          |                |
| Football, rugby or hockey             |                                                          |                                 |                                         |                    |                            |                            |                  |                          |                |
| Rowing                                |                                                          |                                 |                                         |                    |                            |                            |                  |                          |                |
| Volley-ball, netball or basketball    |                                                          |                                 |                                         |                    |                            |                            |                  |                          |                |
| Fishing or hunting                    |                                                          |                                 |                                         |                    |                            |                            |                  |                          |                |
| Horse riding                          |                                                          |                                 |                                         |                    |                            |                            |                  |                          |                |
| Snooker, billiards, darts             |                                                          |                                 |                                         |                    |                            |                            |                  |                          |                |
| Roller or ice skating                 |                                                          |                                 |                                         |                    |                            |                            |                  |                          |                |
| Sailing, wind-surfing or boating      |                                                          |                                 |                                         |                    |                            |                            |                  |                          |                |
| Martial arts, boxing or wrestling     |                                                          |                                 |                                         |                    |                            |                            |                  |                          |                |
| Dancing (ballroom, disco)             |                                                          |                                 |                                         |                    |                            |                            |                  |                          |                |
| Musical instrument playing or singing |                                                          |                                 |                                         |                    |                            |                            |                  |                          |                |
| Other activity 1 :<br>.....           |                                                          |                                 |                                         |                    |                            |                            |                  |                          |                |
| Other activity 2 :<br>.....           |                                                          |                                 |                                         |                    |                            |                            |                  |                          |                |
| Other activity 3 :<br>.....           |                                                          |                                 |                                         |                    |                            |                            |                  |                          |                |

**In the last 4 weeks**, what is the average time you spent **per day** doing these activities **during your leisure time**, **excluding working hours**?

|                                                    | Working days    |                  |                  |              |              |              |              |              |              |               |                | Non working days |                 |                  |                  |              |              |              |              |              |              |               |                |           |  |
|----------------------------------------------------|-----------------|------------------|------------------|--------------|--------------|--------------|--------------|--------------|--------------|---------------|----------------|------------------|-----------------|------------------|------------------|--------------|--------------|--------------|--------------|--------------|--------------|---------------|----------------|-----------|--|
|                                                    | 0 to 15 min/day | 15 to 30 min/day | 30 to 60 min/day | 1h to 2h/day | 2h to 3h/day | 3h to 4h/day | 4h to 5h/day | 5h to 6h/day | 6h to 9h/day | 9h to 12h/day | 12h to 15h/day | > 15h/day        | 0 to 15 min/day | 15 to 30 min/day | 30 to 60 min/day | 1h to 2h/day | 2h to 3h/day | 3h to 4h/day | 4h to 5h/day | 5h to 6h/day | 6h to 9h/day | 9h to 12h/day | 12h to 15h/day | > 15h/day |  |
| Watching TV, DVDs or other videos                  |                 |                  |                  |              |              |              |              |              |              |               |                |                  |                 |                  |                  |              |              |              |              |              |              |               |                |           |  |
| Using a computer, tablet, video games (non active) |                 |                  |                  |              |              |              |              |              |              |               |                |                  |                 |                  |                  |              |              |              |              |              |              |               |                |           |  |
| Using active video games (Wii®, Kinect®,...)       |                 |                  |                  |              |              |              |              |              |              |               |                |                  |                 |                  |                  |              |              |              |              |              |              |               |                |           |  |
| Sitting for reading, writing, knitting, sewing,... |                 |                  |                  |              |              |              |              |              |              |               |                |                  |                 |                  |                  |              |              |              |              |              |              |               |                |           |  |

### **Section E : Physical activity in general**

Do you consider yourself as a physically active?

YES  NO

Are you involved in physical activity for health reasons?

YES  NO

Did you grow up in a family who valued physical activity and more particularly sport and exercise?

- YES, a lot
- YES, a little bit
- NO

Do you think that, for a healthy lifestyle, regular physical activity is....

- Very important
- Important
- Moderately important
- Of little importance
- Pointless
- No opinion

**Time spent sitting**

*In the past 4 weeks*, what is the average time you spent **per day** sitting in the different conditions:

|                     | Working days    |                  |                  |              |              |              |              |              |              |               |                | Non working days |                 |                  |                  |              |              |              |              |              |              |               |                |           |  |  |  |  |
|---------------------|-----------------|------------------|------------------|--------------|--------------|--------------|--------------|--------------|--------------|---------------|----------------|------------------|-----------------|------------------|------------------|--------------|--------------|--------------|--------------|--------------|--------------|---------------|----------------|-----------|--|--|--|--|
|                     | 0 to 15 min/day | 15 to 30 min/day | 30 to 60 min/day | 1h to 2h/day | 2h to 3h/day | 3h to 4h/day | 4h to 5h/day | 5h to 6h/day | 6h to 9h/day | 9h to 12h/day | 12h to 15h/day | > 15h/day        | 0 to 15 min/day | 15 to 30 min/day | 30 to 60 min/day | 1h to 2h/day | 2h to 3h/day | 3h to 4h/day | 4h to 5h/day | 5h to 6h/day | 6h to 9h/day | 9h to 12h/day | 12h to 15h/day | > 15h/day |  |  |  |  |
| During transport    |                 |                  |                  |              |              |              |              |              |              |               |                |                  |                 |                  |                  |              |              |              |              |              |              |               |                |           |  |  |  |  |
| During work         |                 |                  |                  |              |              |              |              |              |              |               |                | Non applicable   |                 |                  |                  |              |              |              |              |              |              |               |                |           |  |  |  |  |
| During leisure time |                 |                  |                  |              |              |              |              |              |              |               |                |                  |                 |                  |                  |              |              |              |              |              |              |               |                |           |  |  |  |  |

**Stair climbing**

Please indicate how often you climbed up a flight of stairs (approx 10 steps) on average **per day during the last 4 weeks**.

Please tick (✓) à on every line.

| Number of times you climbed up a flight of stairs (approx 10 steps) | Average over the last 4 weeks |                    |                     |                      |                      |                          |
|---------------------------------------------------------------------|-------------------------------|--------------------|---------------------|----------------------|----------------------|--------------------------|
|                                                                     | None                          | 1 to 5 times a day | 6 to 10 times a day | 11 to 15 times a day | 16 to 20 times a day | More than 20 times a day |
| On working days                                                     |                               |                    |                     |                      |                      |                          |
| On non-working days                                                 |                               |                    |                     |                      |                      |                          |

**Final question**

Are the last 4 weeks representative of your regular physical activity ? YES  NO

Please detail .....

.....

.....
